# Supplementary material for: Analysis of the Heterogeneities of First and Second Order of Cellulose Derivatives: A Complex Challenge
Source: MDPI journal article supplement (doi:10.3390/polysaccharides2040051), 2021-11-03
Supplement: s1 [file s1]

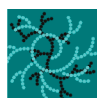

Supplementary Material

# Analysis of the Heterogeneities of First and Second Order of Cellulose Derivatives: A Complex Challenge

Petra Mischnick <sup>1,\*</sup>, Kristin Voiges <sup>1</sup>, Julia Cuers-Dammann <sup>1</sup>, Inga Unterrieser <sup>1</sup>, Patrick Sudwischer <sup>1,2</sup>, Anika Wubben <sup>1</sup> and Payam Hashemi <sup>1,3</sup>

<sup>1</sup> Institute of Food Chemistry, Technische Universität Braunschweig, Schleinitzstr. 20, D-38106 Braunschweig, Germany; kristin@voiges.net (K.V.); julia.cuers@gmail.com (J.C.-D.); inga.unterrieser@gmx.de (I.U.); p.sudwischer@iff-braunschweig.de (P.S.); anikawubben@web.de (A.W.); payam.hashemi@tu-dresden.de (P.H.)

<sup>2</sup> Research Institute of Feed Technology, Frickenmühle 1A, D-38110 Braunschweig Germany

<sup>3</sup> Chair for Functional Materials, Dresden University of Technology, Stadtgutstr. 59, D-01217 Dresden, Germany

\* Correspondence: p.mischnick@tu-braunschweig.de

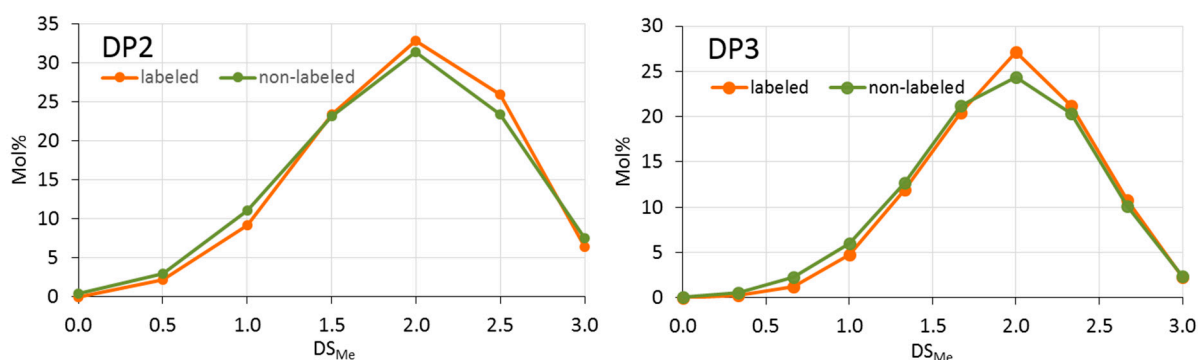

**Figure S1.** Methyl profiles obtained during method development to obtain about one labeled COS/MC molecule, separated from all other COS, derived from the same and different MC chains; MC, DS 1.96; Sample preparation: (1) perdeuteromethylation → MDC; (2) ultrasonic treatment; (3) labeling with *m*ABA; (4) partial hydrolysis; (5) SPE-separation of labeled and unlabeled COS; (6) LC-ESI-IT-MS, neg. mode. Labeled COS: orange; unlabeled COS: green. Because of the overall low concentration of the labeled COS fraction, the constituents being present in lowest amounts have been slightly discriminated in the LC-MS run due to insufficient number of data points due to partial separation of the constituents according to their number of CD<sub>3</sub> and CH<sub>3</sub>. Therefore, the two methyl distribution profiles (labeled, originating from different cellulose chains, and unlabeled, derived from the same and different chains) are even more similar than shown here.

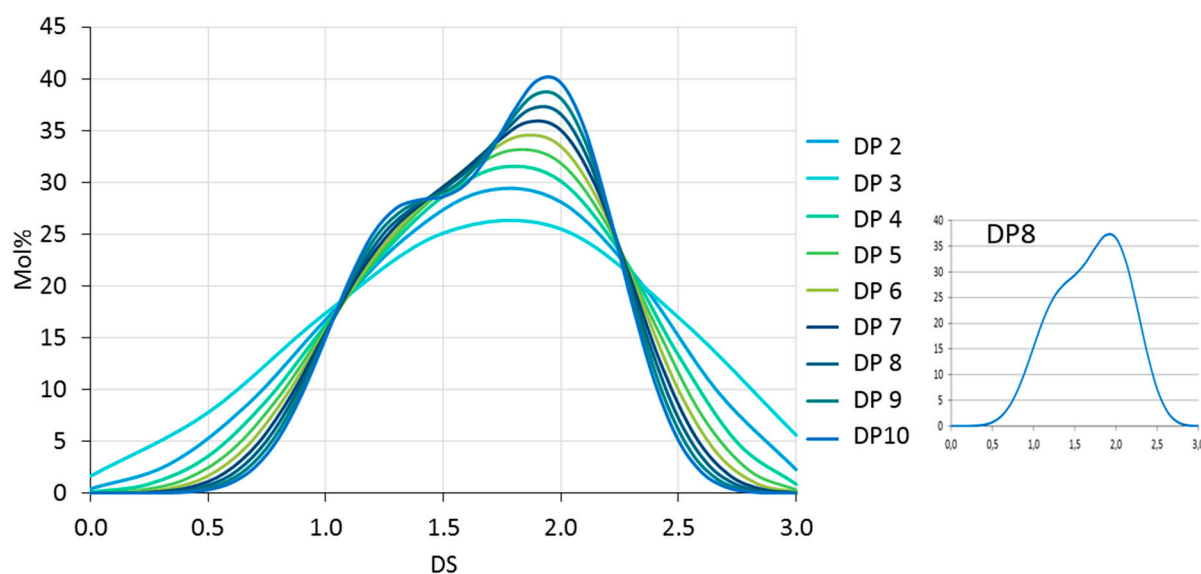

**Figure S2.** Methyl distribution profile calculated for a 2:3 blend of two MCs, DS 1.29 and DS 1.96, from their molar portions  $c_i$  of un-, mono-, di- and trisubstituted AGU. The saddle point between the two MCs becomes visible at DP8, shown separately.

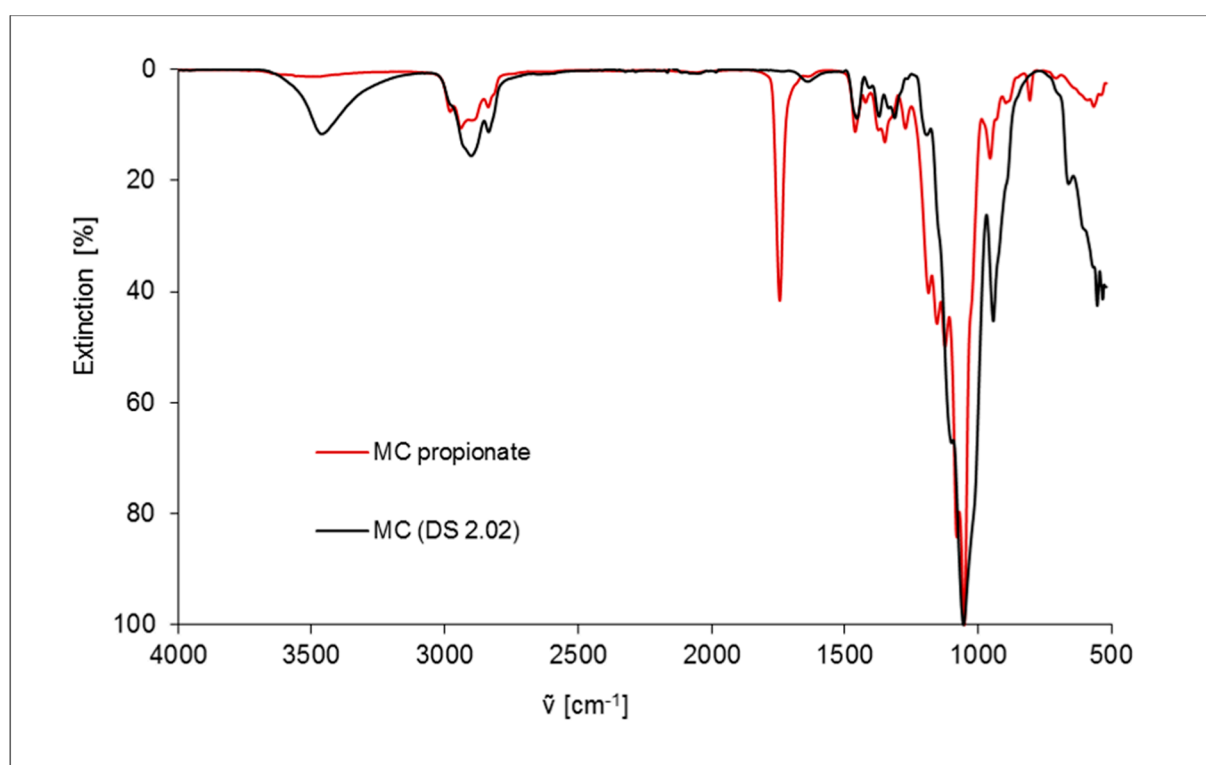

**Figure S3.** ATR-IR spectrum of MC (DS<sub>Me</sub> 2.02) and the precipitated MC propionate; for comparison, extinction is normalized to the C-O vibration at about 1050 cm<sup>-1</sup>.

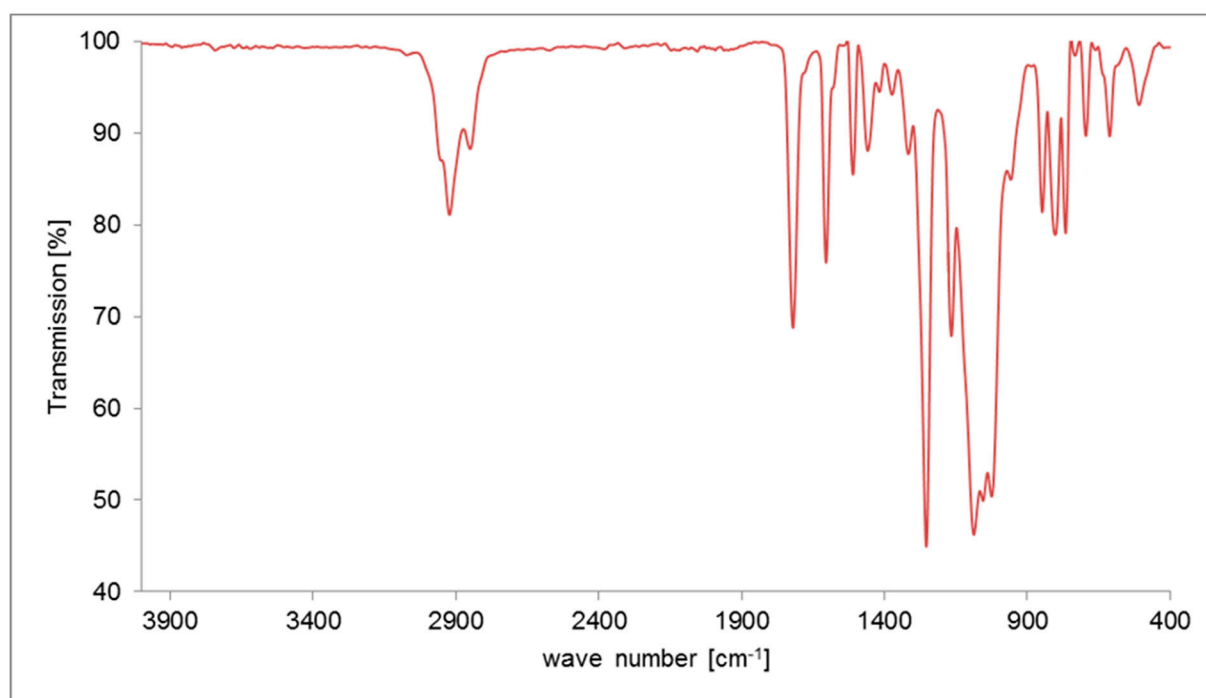

**Figure S4.** ATR-IR spectrum of MC 4-methoxybenzoate, prepared with 4-methoxybenzoyl chloride in pyridine.  $DS_{Me}$  1.92.

**Table S1.** Yields and molar portions of monosaccharide constituents of fractions obtained by stepwise Soxhlet extraction of MC,  $DS$  1.98, %Me = 66.0%, with THF (F1) and MeOH (2) and of the residual MC as determined by GLC of the corresponding alditol acetates. % Me = % of OH of a constituent which are methylated. .

| Scale: 2 g       |      |      | F1 (THF) |      | F2 (MeOH) |      | Residue |      | weighted av-  |
|------------------|------|------|----------|------|-----------|------|---------|------|---------------|
| Constituent      | Mol% | % Me | Mol%     | % Me | Mol%      | % Me | Mol%    | % Me | erage<br>% Me |
| Glucose          | 90.4 | 76.1 | 80.1     | 71.9 | 99.1      | 65.1 |         |      |               |
| Mannose          | 3.9  | 86.7 | 3.4      | 74.2 | 0.2       | 88.3 |         |      |               |
| Xylose           | 5.7  | 81.6 | 16.5     | 74.7 | 0.7       | 96.9 |         |      |               |
| weighted average |      | 76.8 |          | 72.4 |           | 65.4 |         |      | 65.9          |
| Scale: 0.2 g     |      |      | F1 (THF) |      | F2 (MeOH) |      | Residue |      |               |
| Constituent      | Mol% | % Me | Mol%     | % Me | Mol%      | % Me | Mol%    | % Me |               |
| Glucose          | 89.8 | 75.0 | 88.6     | 72.1 | 99.7      | 65.1 |         |      |               |
| Mannose          | 1.8  | 77.8 | 2.6      | 80.2 | 0.1       |      |         |      |               |
| Xylose           | 8.4  | 94.7 | 8.9      | 84.9 | 0.2       |      |         |      |               |
| weighted average |      | 76.7 |          | 73.4 |           | 65.0 |         |      | 65.7          |

**Table S2.** Fractionation of MC propionate and MC methoxybenzoate ( $DS_{Me}$  2.02) by SPE on silica (Me propionate) and RP<sub>18</sub> cartridge (MC-MeOBz), respectively. Eluents, volume ratio, fractions yields and total recovery.

| MC-Propionate<br>Sample Weight 13.9 mg |                        |            |      | MC-Methoxybenzoate<br>Sample Weight 20.0 mg |            |       |
|----------------------------------------|------------------------|------------|------|---------------------------------------------|------------|-------|
|                                        | Eluent                 | Yield / mg | %    | Elutionsmittel                              | Yield / mg | %     |
| F1                                     | EtOAc/Toluol (5/5)     | 3.7        | 26.4 | ACN/H <sub>2</sub> O (5/5)                  | 2.2*       | 10.9* |
| F2                                     | EtOAc/Toluol (7.5/2.5) | 1.6        | 11.5 | ACN/H <sub>2</sub> O (7.5/2.5)              | 3.4        | 17.1  |
| F3                                     | EtOAc/Toluol (9/1)     | 2.1        | 14.9 | ACN/H <sub>2</sub> O (9/1)                  | 6.7        | 33.3  |
| F4                                     | EtOAc                  | 1.7        | 11.9 | ACN                                         | 4.5        | 22.4  |
| F5                                     | acetone                | 4.5        | 32.2 | acetone                                     | 1.2        | 5.8   |
| total                                  |                        | 13.4       | 96.9 |                                             | 17.9       | 89.6  |

\*technical losses

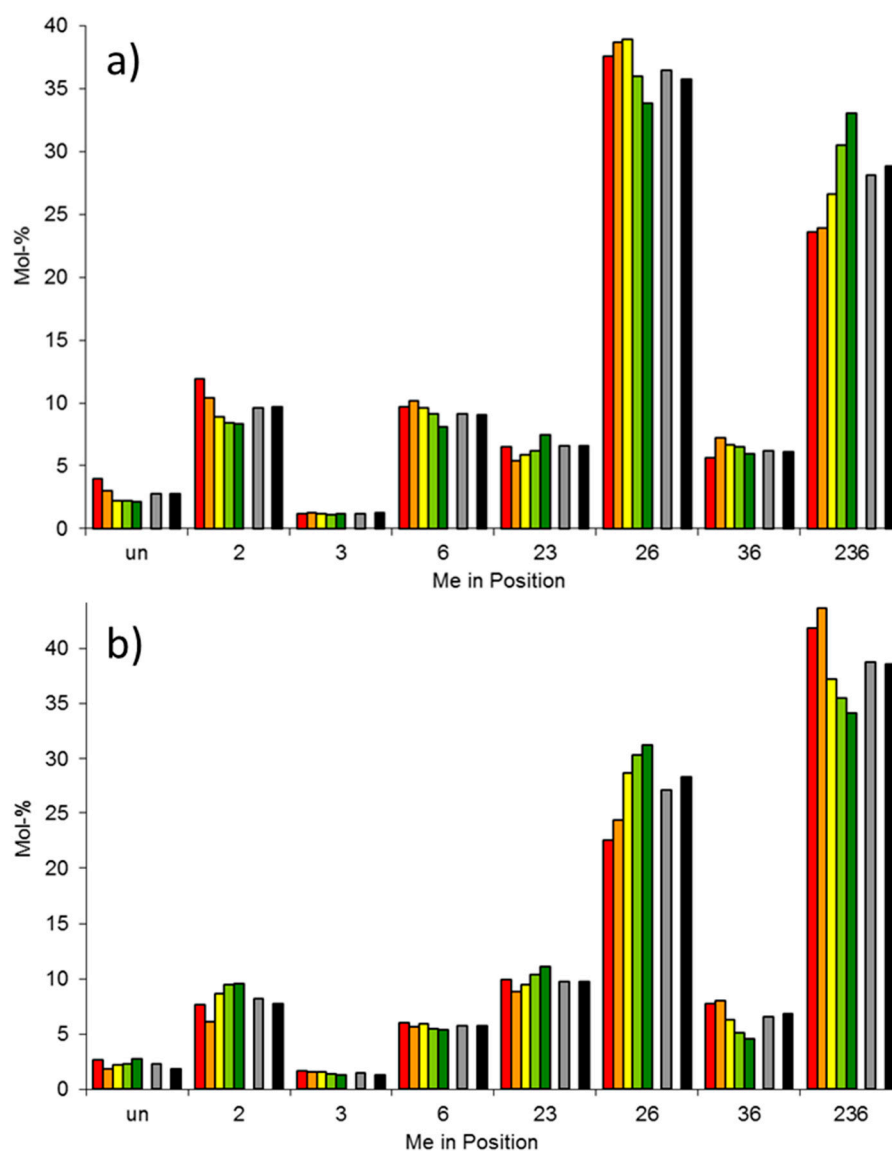**Figure S5.** Methyl pattern in the glucosyl units of the MC fractions given in Table S2 ( $DS_{Me}$  2.02). From left (red) to right (green): F1-F5 according to Table S2; gray: weighted average of all fractions; black: non fractionated MC ester. a) MC-propionate. b) MC-methoxybenzoate. In case of methoxybenzoates, ester cleavage during polysaccharide hydrolysis was not complete. Therefore, the lower O-methylated AGU (i.e. the higher esterified) were discriminated. Nonetheless, the relative change from fractions to fraction is visible.

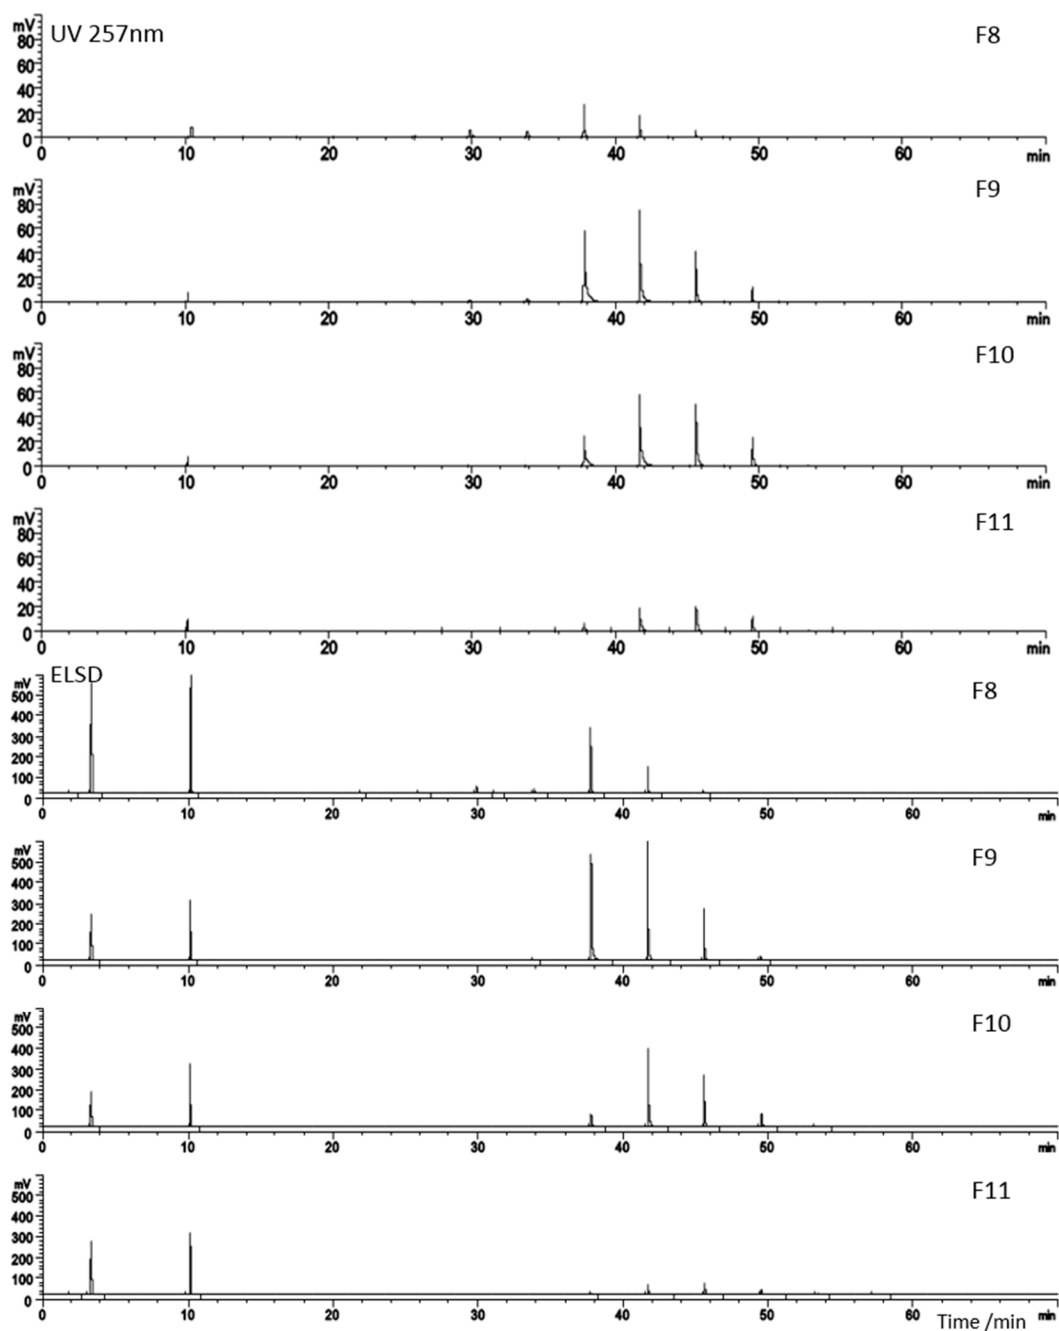

**Figure S6.** Analytical HPLC-runs of the semi-preparative fractions F8-F11 of Figure 9, body text (11%, 19%, 27%, 21% of the MC-MeOBz, w%) of MC-MeOBz ( $DS_{Me}$  1.91) with stepwise adsorption/desorption; Polaris 5 Si-A  $250 \times 4,6$  mm, DCM/2-PrOH, 1 mL/min, 2 min. hold for each, adsorption and desorption step;  $c \approx 0.5$  mg/mL; injection volume: 30  $\mu$ L, detection: (a) UV 257 nm; (b), ELSD.
